1 **Cellular dynamics and genomic identity of centromeres in Rice Blast**

2 Vikas Yadav<sup>1,\*,\$</sup>, Fan Yang<sup>2,\*</sup>, Md. Hashim Reza<sup>1</sup>, Kaustuv Sanyal<sup>1,#</sup> and Naweed I. Naqvi<sup>2,#</sup>

3

4 <sup>1</sup>Molecular Biology and Genetics Unit, Jawaharlal Nehru Centre for Advanced Scientific  
5 Research, Jakkur, Bangalore, India; <sup>2</sup>Temasek Life Sciences Laboratory, 1 Research Link,  
6 Singapore.

7

8 \*These authors contributed equally to this work.

9 <sup>\$</sup>Present address: Department of Molecular Genetics and Microbiology, Duke University  
10 Medical Center, Durham, NC, USA.

11 <sup>#</sup>Corresponding authors

12 Naweed I. Naqvi ([naweed@tll.org.sg](mailto:naweed@tll.org.sg))

13 Kaustuv Sanyal ([sanyal@jncasr.ac.in](mailto:sanyal@jncasr.ac.in))

14

15 Running title: Centromeres in *M. oryzae*.

16

17 Keywords: CenpA, CenpC, Kinetochore, Spindle pole body, Mitosis, *Magnaporthe oryzae*.

18

1 **Abstract**

2 A series of well-synchronized events mediated by kinetochore-microtubule interactions ensure  
3 faithful chromosome segregation in eukaryotes. Centromeres scaffold kinetochore assembly and  
4 are among the fastest evolving chromosomal loci in terms of the DNA sequence, length, and  
5 organization of intrinsic elements. Neither the centromere structure nor the kinetochore dynamics  
6 is well studied in plant pathogenic fungi. Here, we sought to understand the process of  
7 chromosome segregation in the rice blast fungus, *Magnaporthe oryzae*. High-resolution confocal  
8 imaging of GFP-tagged inner kinetochore proteins, CenpA and CenpC, revealed an unusual  
9 albeit transient declustering of centromeres just before anaphase separation in *M. oryzae*.  
10 Strikingly, the declustered centromeres positioned randomly at the spindle midzone without an  
11 apparent metaphase plate *per se*. Using chromatin immunoprecipitation followed by deep  
12 sequencing, all seven centromeres were identified as CenpA-rich regions in the wild-type Guy11  
13 strain of *M. oryzae*. The centromeres in *M. oryzae* are regional and span 57 to 109 kb  
14 transcriptionally poor regions. No centromere-specific DNA sequence motif or repetitive  
15 elements could be identified in these regions suggesting an epigenetic specification of  
16 centromere function in *M. oryzae*. Highly AT-rich and heavily methylated DNA sequences were  
17 the only common defining features of all the centromeres in the Rice Blast. Detailed gene  
18 synteny analyses helped identify and compare the centromere regions in distinct isolates of *M.*  
19 *oryzae* and its related species *Magnaporthe poae*. Overall, this study identifies unusual  
20 centromere dynamics and maps the centromere DNA sequences in the top model fungal  
21 pathogen *M. oryzae*, which causes severe losses in global rice production.

22

## 1 **Significance**

2           *Magnaporthe oryzae* is an important fungal pathogen that causes an annual loss of 10-  
3 30% rice crop due to the devastating blast disease. In most organisms, kinetochores are arranged  
4 either in the metaphase plate or are clustered together to facilitate synchronized anaphase  
5 separation of chromosomes. In this study, we show that the initially clustered kinetochores  
6 separate and position randomly prior to anaphase in *M. oryzae*. Centromeres, identified as the  
7 site of kinetochore assembly, are regional type without any shared sequence motifs in *M. oryzae*.  
8 Together, this study reveals atypical kinetochore dynamics and identifies functional centromeres  
9 in *M. oryzae*, thus paving the way to define heterochromatin boundaries and understand the  
10 process of kinetochore assembly on epigenetically specified centromere loci.

11

## 1 **Introduction**

2 Faithful chromosome segregation is one of the essential processes that is required for  
3 maintaining genome integrity in dividing cells. This process is successfully carried out by the  
4 attachment of microtubules, emanating from opposite spindle poles, to the proteinaceous multi-  
5 subunit structure, the kinetochore, that is pre-assembled onto centromeres (1, 2). The centromere  
6 forms a crucial part of this machinery and yet, it is one of the most rapidly evolving loci in  
7 eukaryotic genomes (3, 4). On the contrary, the proteins that bind to centromere DNA are  
8 evolutionary conserved (2). Centromere DNA shows a wide diversity in the length and  
9 composition of the underlying DNA sequence. A few fungal species, like *Saccharomyces*  
10 *cerevisiae*, harbor centromeres that are less than 400 bp comprising of conserved DNA sequence  
11 elements to form point centromeres (5). Most others possess regional centromeres that span from  
12 few kilobases to several megabases. Unlike point centromeres, regional centromeres in an  
13 organism often do not share any conserved DNA sequence features. For example, the regional  
14 centromeres in *Schizosaccharomyces pombe* and *Candida tropicalis* have a homogenized central  
15 core flanked by inverted repeats (6, 7). Likewise, the regional centromeres in *Cryptococcus*  
16 *neoformans* possess specific retrotransposons that are present randomly therein (8). In contrast,  
17 centromeres in *Candida albicans*, *Candida lusitaniae*, and *Candida dubliniensis* differ between  
18 all chromosomes and lack a conserved DNA sequence element (9-11). Centromeres in  
19 filamentous fungi like *Neurospora crassa*, on the other hand, span long stretches of repetitive  
20 DNA but lack a consensus sequence or pattern (12, 13). Metazoans and plants also have regional  
21 centromeres that are up to few megabases long, and mostly consist of repetitive DNA or  
22 transposons (14-16).

1           Despite this sequence divergence, centromeres in most studied organisms are bound by a  
2 centromere-specific histone H3 variant CENP-A /CenH3/Cse4, also known as the hallmark of  
3 centromere identity (4, 17). CENP-A forms the foundation of the kinetochore assembly and is  
4 essential for cell viability in all organisms studied until date. Evolutionary conservation of  
5 CENP-A along with other kinetochore proteins also provides an efficient tool to identify  
6 centromeres. Additionally, studies with fluorescently-labeled inner kinetochore proteins such as  
7 CENP-A or CENP-C/Cen-C/Mif2 has led to an understanding of spatial dynamics of the  
8 kinetochore within the nucleus (18-22). These studies established that kinetochores in most yeast  
9 species are clustered throughout the nuclear division, and unlike metazoan *CEN*, do not align on  
10 a metaphase plate. However, more recently, some variations to the metaphase plate or  
11 kinetochore clustering have been reported revealing the diversity in this phenomenon.  
12 Kinetochores remain clustered throughout the cell cycle in two well-studied ascomycetes, *S.*  
13 *cerevisiae*, and *C. albicans* (23, 24). In *S. pombe*, kinetochores undergo a brief declustering  
14 during mitosis but remain clustered otherwise (18, 25). Another ascomycete, *Zymoseptoria*  
15 *tritici*, shows multiple kinetochore foci instead of a single cluster during interphase although  
16 their localization dynamics during mitosis remains unexplored (26). On the other hand, the cells  
17 of a basidiomycete *C. neoformans* display multiple foci of kinetochores in interphase, but  
18 kinetochores gradually cluster during mitosis (19, 22). Even the phenomenon of  
19 centromere/kinetochore clustering is observed in *Drosophila* that depends on centric chromatin  
20 rather than specific DNA sequences (27).

21           Besides CENP-A, several other chromatin features are known to be associated with  
22 centromeres. For example, centromeres are devoid of genes/ORFs and exhibit a significantly low  
23 level of polyA transcription as compared to the rest of the genome (8, 28). Furthermore,

1 centromeres in many organisms are heterochromatic in nature and harbor the heterochromatic  
2 marks like H3K9di/trimethylation and DNA methylation (8, 13, 29). A preference for AT-rich  
3 DNA sequence is evident for centromere formation in some organisms (13, 30-32). It is  
4 important to note that none of these features exclusively define centromeres and, in most cases,  
5 the importance of an individual factor in defining centromere loci is not well understood.  
6 However, the presence of such features on discrete chromosomal loci may pave the way for  
7 predicting centromeres in organisms in which genome tractability is difficult.

8         Magnaporthaceae is a family of ascomycete fungi comprising of many important plant  
9 pathogenic species including *Magnaporthe oryzae* and *Magnaporthe poae*. *M. oryzae* causes the  
10 devastating blast disease in cereal crops including rice, wheat, barley and millet (33, 34). *M.*  
11 *poae* is responsible for summer-patch disease in turf grasses (35). *M. oryzae*, also known as rice  
12 blast, is a constant threat to agriculture-based economies due to significant damage to rice  
13 harvests. In recent years, rice blast has also emerged as a model pathosystem for studying host-  
14 pathogen interactions due to the availability of the genome sequence, fully characterized  
15 infection cycle, genetic tractability and economic significance of the fungus (36, 37). However,  
16 even with the availability of the genome sequence and annotated assembly, the  
17 centromere/kinetochore identity of the rice blast fungus remains unexplored or poorly defined.  
18 Here, we first studied and characterized orthologs of CENP-A and CENP-C, two well-conserved  
19 kinetochore proteins, to understand the kinetochore dynamics in this organism and used these  
20 kinetochore proteins as tools to identify bona fide centromeres.

21

22

## 1 **Results**

### 2 *Kinetochores are clustered during interphase in M. oryzae*

3           A subset of putative kinetochore proteins was previously annotated in *M. oryzae* (12). We  
4 expanded the list further by identifying putative orthologs of the remaining conserved  
5 kinetochore proteins using *in silico* predictions (SI Appendix, Table S1). Multiple sequence  
6 alignment established the identity of at least two most conserved inner kinetochore proteins:  
7 CenpA (MGG\_06445, a homolog of CENP-A) and CenpC (MGG\_06960, a homolog of CENP-  
8 C) (SI Appendix, Figure S1) in *M. oryzae*. CenpA and CenpC of *M. oryzae* share 73% and 42%  
9 sequence identity with their *N. crassa* counterparts CenH3 and CEN-C, respectively. Next, we  
10 functionally expressed the GFP-tagged CenpA and CenpC from their native genomic loci in the  
11 wild-type Guy11 strain of *M. oryzae*. GFP-CenpA and CenpC-GFP signals appeared as a single  
12 dot-like and co-localized on chromatin, marked by mCherry-tagged histone H1 (Figure 1A, 1B).  
13 Further, co-localization of CenpA and CenpC signals confirmed their overlapping spatial  
14 positions in both mycelia and conidia (Figure 1C). Clustering of kinetochores is a hallmark  
15 feature of many yeast and fungal genera. Such clustered kinetochores are often found in close  
16 proximity to the spindle pole bodies (SPBs) (38). We localized SPBs by tagging Alp6 (ortholog  
17 of *S. cerevisiae* Spc98) with mCherry and observed that SPBs localize close to the clustered  
18 GFP-CenpA signals in *M. oryzae* (Figure 1D). These results indicate that kinetochore  
19 localization during interphase in *M. oryzae* is similar to that observed in other ascomycetes. Our  
20 attempts to delete *CENPA* or *CENPC* in *M. oryzae* failed indicating that both are essential for  
21 cell viability. This result was further corroborated by conditional repression of *CENPA* using the  
22 Tet-off system. The *Tet-GFP-CENPA* strain ceased to grow on culture media supplemented with  
23 doxycycline, the condition in which Tet-driven *CENPA* expression is shut down (SI Appendix,

1 Figure S2A). Overall, the conserved sequence features and the subcellular localization patterns  
2 confirmed that CenpA and CenpC are evolutionarily conserved kinetochore proteins in *M.*  
3 *oryzae*.

#### 4 5 *Kinetochores in M. oryzae undergo declustering-clustering dynamics during mitosis*

6 To study the cellular dynamics of kinetochores in *M. oryzae*, we localized microtubules  
7 by expressing mCherry-TubA or GFP-TubA fusion protein and co-localized it with GFP-CenpA.  
8 During interphase, the microtubules are mostly localized throughout the cytoplasm (SI  
9 Appendix, Figure S2B). Live-cell imaging during mitosis revealed dispersed GFP-CenpA signals  
10 localized along the mitotic spindle (Figure 2A and Movie S1). Strikingly, the declustered dot-  
11 like signals of GFP-CenpA then segregated into two halves in a non-synchronous manner. Once  
12 segregated, the signals began to cluster again and localized as two bright foci close to poles of  
13 the mitotic spindle. To further probe the dynamics of kinetochore segregation, we performed  
14 high-resolution imaging in mitotic cells expressing GFP-CenpA (Figure 2B, C, Movie S2 and  
15 S3). We observed that while the GFP-CenpA signals were spread out, they were localized in  
16 pairs, most likely representing the segregated kinetochore signals (Figure 2B, time 00:32). We  
17 were able to count fourteen discrete spots of GFP-CenpA corresponding to 14 kinetochores of  
18 the seven duplicated chromosomes. These results suggest that kinetochores in *M. oryzae* remain  
19 largely unclustered during mitosis. It was further supported by co-localization of GFP-CenpA  
20 with a SPB marker Alp6-mCherry during the mitotic stages (Figure 2D). In pre-mitotic cells, we  
21 observed two duplicated spots of Alp6-mCherry that co-localized with replicated clustered GFP-  
22 CenpA signals. During mitosis, GFP-CenpA signal localized as multiple puncta scattered in  
23 between the two SPBs represented by Alp6-mCherry. After the division, the GFP-



1 CenpA/kinetochores clustered again and localized adjacent to the SPBs (SI Appendix, Figure  
2 S2C, and Movie S4). Taken together, we conclude that kinetochores decluster during mitosis in  
3 *M. oryzae*, and align along the mitotic spindle. Furthermore, we infer that an equatorial plate  
4 alignment of the kinetochores is not evident in *M. oryzae*, indicating a lack of a well-defined  
5 metaphase plate. Similar dynamics of the kinetochore and microtubules were observed in *M.*  
6 *oryzae* cells during pathogenic development and *in planta* conditions (SI Appendix, Figure S3,  
7 Movie S5, and S6). Based on these observations, we propose a schematic model for the  
8 kinetochore and SPB dynamics during the mitotic cycle in rice blast where kinetochore  
9 clustering-declustering dynamics is most likely dependent on their direct link to the SPBs  
10 (Figure 2E). During mitosis, this link is likely broken, and the clustering is thus perturbed. We  
11 infer that such timely and dynamic kinetochore clustering/declustering is crucial for proper  
12 chromosome segregation in *M. oryzae*.

13

#### 14 *Kinetochore protein binding identifies regional centromeres in M. oryzae*

15 CenpA binding is a hallmark of functional centromeres in eukaryotes (4, 15). We used  
16 GFP-CenpA as a tool for molecular identification of centromeres in the *M. oryzae* genome. We  
17 utilized chromatin immunoprecipitation (ChIP) assays followed by deep sequencing (ChIP-seq)  
18 of GFP-CenpA-associated chromatin fragments and aligned the reads on the recently published  
19 PacBio genome assembly of the wild-type Guy11 strain of *M. oryzae* (39). This analysis revealed  
20 seven distinct CenpA-rich regions across the genome, one each on seven different contigs  
21 (Figure 3, Table 1 and SI Appendix, Figure S4). The CenpA binding spans a 57 to 109 kb region  
22 suggesting that *M. oryzae* possesses large regional centromeres. The centromere identity of these  
23 regions was further validated by binding of another evolutionarily conserved independent

1 kinetochore protein CenpC. ChIP-qPCR using the fungal strain expressing CenpC-GFP (SI  
2 Appendix, Figure S5A) confirmed specific overlapping binding of CenpA and CenpC on each of  
3 these seven *CEN* regions. We also observed an additional region of 1200 bp on Contig 4 apart  
4 from the seven distinct peaks in CenpA ChIP-seq analysis. The enriched peak was found to be  
5 present on the gene encoding the vacuolar morphogenesis protein AvaB (MGG\_01045). Using  
6 specific ChIP-qPCR primers for this region, we confirmed that the aforementioned CenpA  
7 enrichment on Contig 4 was likely an artifact (SI Appendix, Figure S5B). Overall, the binding of  
8 two independent kinetochore proteins at seven long regions confirmed that these are indeed  
9 authentic centromeres of the corresponding chromosomes in *M. oryzae*.

10 A detailed analysis revealed that the seven centromeres in *M. oryzae* comprise of highly  
11 AT-rich sequences ( $\geq 67\%$ ) (Figure 3B and Table 1). The centromeres in *M. oryzae* harbor a few  
12 repetitive elements, mostly retrotransposons belonging to long terminal repeat (LTR) elements  
13 (Figure 3B, Dataset S1). However, these elements are neither exclusive to the centromeres nor  
14 common among the seven centromeres in *M. oryzae*. Further in-depth analysis of these regions  
15 did not reveal any common DNA sequence motif or repeats as supported by the dot-plot analysis  
16 of each centromere (SI Appendix, Figure S6). We then examined the transcriptional status and  
17 base modifications associated with centromeric chromatin using the published RNA-sequencing  
18 and bisulfite sequencing data (40, 41). Centromeres in *M. oryzae* are found to be poorly  
19 transcribed and harbor 5mC DNA methylation (Figure 3). Based on these results, we conclude  
20 that centromeres in *M. oryzae* do not share any common DNA sequence motif or repeat element  
21 and that AT-richness is likely the only defining sequence feature of all the centromeres in *M.*  
22 *oryzae*. Additionally, we also infer that centromeres in *M. oryzae* are large, regional and lie  
23 within transcriptionally-poor 5mC-rich DNA regions of the genome.

1

2 *Centromere DNA sequences are rapidly evolving in Magnaporthe species*

3         The MG8 genome assembly is based on the sequencing of the *M. oryzae* isolate 70-15,  
4 which represents a progeny of the Guy11 strain (36, 42, 43). This would mean that the 70-15  
5 assembly must harbor at least 50% genome sequence of Guy11. The PacBio genome sequence of  
6 Guy11 provides a near complete end-to-end chromosome-wide coverage of the 70-15 genome,  
7 the only chromosome-level sequence assembly available for *M. oryzae* (SI Appendix, Figure  
8 S7A). Thus, we attempted to identify the centromere location in the 70-15 isolate by aligning  
9 CenpA ChIP-seq reads on to the MG8 assembly. This analysis revealed seven distinct peaks, one  
10 on each chromosome (Figure 4A, SI Appendix, Figure S7B, and Table S2). We also observed  
11 two additional CenpA-enriched regions in the unassembled Supercontig8.8 of MG8 assembly for  
12 70-15 (SI Appendix, Figure S7C). Additionally, the identified centromere on chromosome 7 in  
13 this assembly mapped to the same region that was previously predicted to harbor the centromere  
14 based on genetic analysis (44).

15         Next, we analyzed the recently published PacBio genome sequence/assembly of the *M.*  
16 *oryzae* field isolate FJ81278 (39) to identify the centromere sequences and compare them with  
17 the 70-15 assembly. Mapping of CenpA ChIP-seq reads revealed nine distinct peaks in the  
18 FJ81278 genome assembly (SI Appendix, Figure S8, and Table S2). Three of these enriched  
19 regions were present at the end of three separate contigs (Contig 3, 14 and 16). By comparing  
20 genome assemblies of 70-15 and FJ81278, we concluded that contigs 3 and 14 are most likely  
21 parts of the same chromosome and the CenpA-enriched regions observed in these two contigs  
22 represent a single centromere (*CEN4*). Synteny analysis also revealed that the CenpA peaks in  
23 Contig 11 and 16 belong to the same chromosome. However, Contig11 of FJ81278 assembly

1 seems to be mis-assembled, since a part of this contig does not show synteny with any region of  
2 the 70-15 genome. Thus, we excluded this centromere (*CEN7*) region from further analysis.

3         Next, we compared the centromeres and the flanking regions from the genome  
4 assemblies of Guy11, 70-15, and FJ81278. Detailed synteny analyses revealed that the  
5 centromere flanking regions are conserved among these three isolates indicating that the overall  
6 position of centromeres is likely conserved in different strains/field isolates of *M. oryzae* (Figure  
7 4B and SI Appendix, Figure S9). However, a major part of the centromere sequences was found  
8 to be missing from the 70-15 genome assembly as compared to Guy11 and FJ81278. It is  
9 important to note that the MG8 version of the 70-15 genome assembly is not complete and  
10 harbors a number of gaps. We believe that some of the centromere sequences are part of the  
11 unassembled Supercontig8.8 and are the CenpA-enriched regions observed in this fragment. The  
12 centromere sequences of Guy11 and FJ81278 isolates shared a high level of conservation with a  
13 few rearrangements. To explore this further, we performed a pair-wise comparison using  
14 sequences of respective centromeres from Guy11 and FJ81278 genomes. This analysis revealed  
15 that while most of the AT-rich sequence remains conserved between the two isolates, the repeat  
16 content varies significantly and accounts for almost all the observed rearrangements (Figure 4C,  
17 SI Appendix, Figure S10, and Dataset S2). These results suggest that repeat elements might  
18 shape the structure of centromeres in different isolates even though they may not be an integral  
19 part of centromeres.

20

### 21 *Inter-species comparison of CEN sequences in Magnaporthaceae*

22         The analysis in different isolates of *M. oryzae* further validated that centromeres in this  
23 species comprise of long AT-rich and transcription-poor regions. Using these parameters, we

1 attempted to predict centromeres in *M. poae*, the root infecting pathogen that belongs to the  
2 Magnaporthaceae family as well (35). We were able to identify eight putative centromere regions  
3 across the *M. poae* genome based on this *in-silico* analysis (SI Appendix, Figure S11, and Table  
4 S3). Three of these eight putative *CEN* regions were present at the end of different contigs. Since  
5 the chromosome number in *M. poae* is not established, it is uncertain whether all of these AT-  
6 rich regions represent bona fide centromeres in *M. poae*. We also found that these putative  
7 centromeres in *M. poae* harbor more repetitive DNA sequences than *M. oryzae* even though the  
8 genomic repeat content of *M. poae* is only 1.1% as compared to 10.1% in *M. oryzae*. Unlike,  
9 different isolates of *M. oryzae* that share a high level of centromere sequence conservation, the  
10 centromere sequence of *M. oryzae* and *M. poae* are highly diverged. Based on these results, we  
11 conclude that centromere DNA sequences in the *Magnaporthaceae* family are rapidly evolving,  
12 whereas the properties of centromeric chromatin are likely conserved between the two species.

13

## 14 **Discussion**

15 Blast disease caused by *M. oryzae* is exceedingly disastrous not only to rice production  
16 worldwide but also to several graminaceous crops (34). Despite being such a vital plant  
17 pathogen, the fundamental cellular process of chromosome segregation is not well understood in  
18 this organism. In this work, we attempted to study the chromosome segregation machinery in *M.*  
19 *oryzae* at the molecular level. We tagged two evolutionarily conserved key kinetochore proteins  
20 and studied their dynamics during different phases of the cell cycle at various developmental  
21 stages in *M. oryzae*. We further identified the genomic loci that act as centromeres in this  
22 filamentous fungus. Based on a comparison of centromere sequences among different isolates of

1 *M. oryzae* and a related species, *M. poae*, centromeres appear to be rapidly evolving in  
2 *Magnaporthe*, as reported in several fungal species complex before (6, 8, 10, 12, 45, 46).

3 Kinetochores cluster together in a single locus at the nuclear periphery in many fungi.

4 This locus is often referred to as the CENP-A-rich zone or CENP-A cloud (47, 48). It has been  
5 proposed that such a nuclear subdomain with a high concentration of CENP-A favor centromere  
6 seeding on the chromosomal regions in close proximity to it, in the absence of a centromere-  
7 specific DNA sequence. In most budding yeasts, kinetochores are clustered throughout the cell  
8 cycle except in *C. neoformans*, which shows clustered kinetochores only during mitosis (19).

9 The kinetochore dynamics in *M. oryzae* is found to be similar to the “fission” yeast rather than  
10 that of the budding yeast species. It is possible that mitotic declustering of kinetochores is a  
11 feature of all yeasts/fungi that divide by septum formation. However, a more detailed analysis of  
12 kinetochore behavior in filamentous fungi like *N. crassa* and *Z. tritici* will be useful to establish  
13 this link. It is noteworthy that *Z. tritici* does not have a single centromere cluster, but  
14 kinetochores are arranged in multiple chromocenters, a process observed in some plant species  
15 (26, 49). We also observed that kinetochores align along the mitotic spindle in *M. oryzae*, though  
16 a proper metaphase plate formation was not evident. A similar kinetochore arrangement was also  
17 observed in a basidiomycete *C. neoformans* (19). The presence of such a structure in two  
18 evolutionarily distant fungal species suggests the existence of a transient formation of a structure,  
19 an arrangement alternative to the metaphase plate, across the fungal kingdom. In addition, co-  
20 localization of kinetochore proteins and SPBs revealed a close association between the two as  
21 observed in *S. pombe* (25). Our results also suggest that a direct interaction between the SPBs  
22 and kinetochores may facilitate kinetochore clustering. The SPB-kinetochore interaction has

1 been explored in other fungi and led to the identification of several uncharacterized proteins (22,  
2 50-53). It remains to be seen whether or not such interactions occur in *M. oryzae* as well.

3         Centromere DNA sequences, despite being associated with a conserved and essential  
4 function, are highly divergent across species (3). The centromeres identified in *M. oryzae* further  
5 add to this diversity of centromere sequences. Our results show that centromeres in *M. oryzae* are  
6 long and AT-rich similar to those reported in *N. crassa* except that the centromeres are  
7 significantly shorter in *M. oryzae* (57-109 kb) compared to *N. crassa* (150-300 kb) (12, 13). The  
8 DNA methylation pattern observed in *M. oryzae* is similar to that of *N. crassa* as it is present at  
9 multiple loci in both the organisms and thus differs from that of *C. neoformans* where DNA  
10 methylation is restricted to only centromeres and telomeres (8, 13). Additionally, a specific  
11 pattern of centromeric histone binding has been reported in *N. crassa*, but no such pattern exists  
12 in *M. oryzae*. Since centromere DNA sequences are generally repeat-rich, they are poorly  
13 assembled which restricts finer analysis of *CEN* DNA sequence. For example, centromeres in  
14 *Fusarium graminearum* are proposed to be AT-rich, similar to that of *M. oryzae* and *N. crassa*  
15 (12). However, the exact nature of the centromere sequence of these regions remains unknown in  
16 *F. graminearum* due to sequence gaps in the genome assembly. Similarly, most of the  
17 centromere sequences are absent in the currently available 70-15 genome assembly of *M. oryzae*.  
18 Taking together, an improved genome assembly with complete chromosome-level sequence  
19 information is required for a better understanding of a complex genomic locus like the  
20 centromere.

21         Apart from filamentous fungi, AT-rich centromeres are present in other fungal species  
22 like *Malassezia sympodialis*, albeit the length of these regions is significantly smaller as  
23 compared to *M. oryzae* centromeres (32). The CDEII element of point centromeres present in the

1 budding yeast, *S. cerevisiae*, is also highly AT-rich (54). A recent study reports the presence of  
2 AT-rich centromeres of varying lengths in diatoms (30). Furthermore, the 171-bp alpha satellite  
3 repeat DNA present in human centromeres is also AT-rich in nature (55). Overall, these results  
4 suggest that AT-richness favors centromere function in many organisms. Intriguingly, *in vitro*  
5 experiments suggest that CENP-A binds with a lower affinity to an AT-rich DNA sequence (56).  
6 In contrast, the same study also revealed that the CENP-A chaperone Scm3 has a higher affinity  
7 towards AT-rich sequences. With more AT-rich centromeres being characterized, identifying the  
8 exact role of AT-rich sequences in centromere function is critical.

9 Regional centromeres of many organisms, including *M. oryzae*, do not share any  
10 common DNA sequence motifs. Rather, non-DNA sequence determinants mark centromeres in  
11 an epigenetic manner in many organisms. Some epigenetic determinants of centromere identity  
12 in fungi include early replicating regions of the genome (57-59), proximity to DNA replication  
13 origins (60), DNA replication initiator proteins (61), homologous recombination-repair proteins  
14 (60, 62) and proteins that facilitate kinetochore clustering by tethering kinetochores to SPBs (22,  
15 50). Factors that favor local folding and looping of chromatin may also add to the process of  
16 centromere specification (4, 48, 63). Repeats and transposons have been shown to play an  
17 essential role in centromere evolution (64-66). Previous reports in *M. oryzae* suggested the  
18 presence of multiple clusters of repeat elements across the genome (40, 44). These studies also  
19 proposed that repeats play an important role in *M. oryzae* genome evolution and its association  
20 with the host. In this study, we find that the centromere location is close to these repeat clusters  
21 in some but not all chromosomes. Our results raise the possibility that centromere sequences in  
22 *M. oryzae* are prone to repeat-mediated evolution.



1           A comparison between two *M. oryzae* isolates, Guy11 and FJ81278, revealed that while  
2 the overall *CEN* DNA sequence between the two isolates is very similar, the repeat content at the  
3 centromeres of orthologous chromosomes varies widely. It is known that centromere DNA  
4 sequence among isolates of *N. crassa* can be different (12). The *CEN* sequences identified here  
5 would pave the way for a more detailed comparative analysis of centromeres in diverse isolates  
6 of *M. oryzae*. Such analyses will provide valuable insights into centromere evolution in this  
7 species and the potential impact of host factors on this process. A comparative genome analysis  
8 between *M. oryzae* and *M. poae* revealed the presence of a higher density of repeats in the latter.  
9 Overall, these results suggest that while the centromere DNA sequence properties, not the DNA  
10 sequence *per se*, remain conserved in this species complex, the centromere architecture is  
11 divergent and might have been shaped by the repeat elements. Further studies will provide more  
12 insights into the evolution of centromere DNA sequences and its possible link to host adaptation  
13 and variability in virulence within the *Magnaporthe* species complex.

14

## 15 **Materials and Methods**

16           Wild-type *M. oryzae* strain Guy11 (MAT1-2; a kind gift from Lebrun group, France) was  
17 used as the parent strain for all the experiments conducted in this study (except for the results  
18 shown in SI Appendix, Figure S3, Movie S5 and S6 that were performed using B157 strain). The  
19 strains thus validated and used in this study are listed in SI Appendix, Table S4. The plasmids  
20 and primers used for epifluorescence labeling in *M. oryzae* strains are listed in SI Appendix,  
21 Table S5, and S6, respectively. The detailed information about the plasmid construction is  
22 available in the SI Appendix, supplementary materials, and methods. Details of all the  
23 experimental procedures and sequence analysis are given in SI Appendix, Materials and

1 Methods. The ChIP-sequencing reads have been deposited under NCBI BioProject Accession ID  
2 PRJNA504461.

3

#### 4 **Acknowledgments**

5 We thank Clevergene Biocorp Pvt. Ltd., Bengaluru for generating the CenPA ChIP-  
6 sequencing reads. VY was a Senior Research Fellow (SRF, grant number  
7 09/733(0179)/2012/EMR-I) supported by Council of Scientific and Industrial Research (CSIR),  
8 Government of India. FY is supported by a postdoctoral fellowship from Temasek Life Sciences  
9 Laboratory (TLL) Singapore. MHR is a National Postdoctoral Fellow (N-PDF, fellowship  
10 reference number PDF/2016/002858), supported by the Science and Engineering Research Board  
11 (SERB), Department of Science and Technology (DST), Government of India. NIN  
12 acknowledges funding support from TLL, and the National Research Foundation (PMO,  
13 Singapore; NRF-CRP7-2010-02 and NRF-CRP16-2015-04). KS is a Tata innovation fellow  
14 (grant number BT/HRT/35/01/03/2017), is supported by a grant for Life Science Research,  
15 Education and Training (BT/INF/22/SP27679/2018) of Department of Biotechnology, Govt. of  
16 India and intramural funding from JNCASR.

17

## 1 References

- 2 1. Musacchio A & Desai A (2017) A Molecular View of Kinetochores Assembly and  
3 Function. *Biology* 6(1).
- 4 2. Cheeseman IM (2014) The kinetochore. *Cold Spring Harb Perspect Biol* 6(7):a015826.
- 5 3. Henikoff S, Ahmad K, & Malik HS (2001) The centromere paradox: Stable inheritance  
6 with rapidly evolving DNA. *Science* 293(5532):1098-1102.
- 7 4. Yadav V, Sreekumar L, Guin K, & Sanyal K (2018) Five pillars of centromeric  
8 chromatin in fungal pathogens. *PLoS Pathog* 14(8):e1007150.
- 9 5. Roy B & Sanyal K (2011) Diversity in requirement of genetic and epigenetic factors for  
10 centromere function in fungi. *Eukaryot Cell* 10(11):1384-1395.
- 11 6. Chatterjee G, *et al.* (2016) Repeat-associated fission yeast-like regional centromeres in  
12 the ascomycetous budding yeast *Candida tropicalis*. *PLoS Genet* 12(2):e1005839.
- 13 7. Pidoux AL & Allshire RC (2005) The role of heterochromatin in centromere function.  
14 *Philosophical transactions of the Royal Society of London. Series B, Biological sciences*  
15 360(1455):569-579.
- 16 8. Yadav V, *et al.* (2018) RNAi is a critical determinant of centromere evolution in closely  
17 related fungi. *Proc Natl Acad Sci U S A* 115(12):3108-3113.
- 18 9. Kapoor S, Zhu L, Froyd C, Liu T, & Rusche LN (2015) Regional centromeres in the  
19 yeast *Candida lusitanae* lack pericentromeric heterochromatin. *Proc Natl Acad Sci U S*  
20 *A* 112(39):12139-12144.
- 21 10. Padmanabhan S, Thakur J, Siddharthan R, & Sanyal K (2008) Rapid evolution of Cse4p-  
22 rich centromeric DNA sequences in closely related pathogenic yeasts, *Candida albicans*  
23 and *Candida dubliniensis*. *Proc Natl Acad Sci U S A* 105(50):19797-19802.
- 24 11. Sanyal K, Baum M, & Carbon J (2004) Centromeric DNA sequences in the pathogenic  
25 yeast *Candida albicans* are all different and unique. *Proc Natl Acad Sci U S A*.  
26 101(31):11374-11379.
- 27 12. Smith KM, Galazka JM, Phatale PA, Connolly LR, & Freitag M (2012) Centromeres of  
28 filamentous fungi. *Chromosome Res* 20(5):635-656.
- 29 13. Smith KM, Phatale PA, Sullivan CM, Pomraning KR, & Freitag M (2011)  
30 Heterochromatin is required for normal distribution of *Neurospora crassa* CenH3. *Mol*  
31 *Cell Biol* 31(12):2528-2542.
- 32 14. Comai L, Maheshwari S, & Marimuthu MPA (2017) Plant centromeres. *Curr Opin Plant*  
33 *Biol* 36:158-167.
- 34 15. Westhorpe FG & Straight AF (2014) The centromere: epigenetic control of chromosome  
35 segregation during mitosis. *Cold Spring Harb Perspect Biol* 7(1):a015818.
- 36 16. Aldrup-Macdonald ME & Sullivan BA (2014) The past, present, and future of human  
37 centromere genomics. *Genes (Basel)* 5(1):33-50.
- 38 17. Stellfox ME, Bailey AO, & Foltz DR (2013) Putting CENP-A in its place. *Cell Mol Life*  
39 *Sci* 70(3):387-406.
- 40 18. Funabiki H, Hagan I, Uzawa S, & Yanagida M (1993) Cell cycle-dependent specific  
41 positioning and clustering of centromeres and telomeres in fission yeast. *J Cell Biol*  
42 121(5):961-976.
- 43 19. Kozubowski L, *et al.* (2013) Ordered kinetochore assembly in the human-pathogenic  
44 basidiomycetous yeast *Cryptococcus neoformans*. *mBio* 4(5):e00614-00613.
- 45 20. Kursel LE & Malik HS (2016) Centromeres. *Curr Biol* 26(12):R487-490.

- 1 21. Thakur J & Sanyal K (2012) A coordinated interdependent protein circuitry stabilizes the  
2 kinetochore ensemble to protect CENP-A in the human pathogenic yeast *Candida*  
3 *albicans*. *PLoS Genet* 8(4):e1002661.
- 4 22. Yadav V & Sanyal K (2018) Sad1 Spatiotemporally Regulates Kinetochore Clustering  
5 To Ensure High-Fidelity Chromosome Segregation in the Human Fungal Pathogen  
6 *Cryptococcus neoformans*. *mSphere* 3(4).
- 7 23. Jin QW, Fuchs J, & Loidl J (2000) Centromere clustering is a major determinant of yeast  
8 interphase nuclear organization. *J Cell Sci* 113 ( Pt 11):1903-1912.
- 9 24. Sanyal K & Carbon J (2002) The CENP-A homolog CaCse4p in the pathogenic yeast  
10 *Candida albicans* is a centromere protein essential for chromosome transmission. *Proc*  
11 *Natl Acad Sci U S A*. 99(20):12969-12974.
- 12 25. Hou H, *et al.* (2012) Csi1 links centromeres to the nuclear envelope for centromere  
13 clustering. *J Cell Biol* 199(5):735-744.
- 14 26. Schotanus K, *et al.* (2015) Histone modifications rather than the novel regional  
15 centromeres of *Zymoseptoria tritici* distinguish core and accessory chromosomes.  
16 *Epigenetics Chromatin* 8:41.
- 17 27. Padeken J, *et al.* (2013) The nucleoplasmin homolog NLP mediates centromere  
18 clustering and anchoring to the nucleolus. *Mol Cell* 50(2):236-249.
- 19 28. Sun S, *et al.* (2017) Fungal genome and mating system transitions facilitated by  
20 chromosomal translocations involving intercentromeric recombination. *PLoS Biol*  
21 15(8):e2002527.
- 22 29. Cam HP, *et al.* (2005) Comprehensive analysis of heterochromatin- and RNAi-mediated  
23 epigenetic control of the fission yeast genome. *Nature genetics* 37(8):809-819.
- 24 30. Diner RE, *et al.* (2017) Diatom centromeres suggest a mechanism for nuclear DNA  
25 acquisition. *Proc Natl Acad Sci U S A* 114(29):E6015-E6024.
- 26 31. Lynch DB, Logue ME, Butler G, & Wolfe KH (2010) Chromosomal G + C content  
27 evolution in yeasts: systematic interspecies differences, and GC-poor troughs at  
28 centromeres. *Genome biology and evolution* 2:572-583.
- 29 32. Zhu Y, *et al.* (2017) Proteogenomics produces comprehensive and highly accurate  
30 protein-coding gene annotation in a complete genome assembly of *Malassezia*  
31 *sympodialis*. *Nucleic Acids Res* 45(5):2629-2643.
- 32 33. Talbot NJ (2003) On the trail of a cereal killer: Exploring the biology of *Magnaporthe*  
33 *grisea*. *Annu Rev Microbiol* 57:177-202.
- 34 34. Fernandez J & Orth K (2018) Rise of a Cereal Killer: The Biology of *Magnaporthe*  
35 *oryzae* Biotrophic Growth. *Trends Microbiol* 26(7):582-597.
- 36 35. Okagaki LH, *et al.* (2015) Genome Sequences of Three Phytopathogenic Species of the  
37 *Magnaporthaceae* Family of Fungi. *G3 (Bethesda)* 5(12):2539-2545.
- 38 36. Dean RA, *et al.* (2005) The genome sequence of the rice blast fungus *Magnaporthe*  
39 *grisea*. *Nature* 434(7036):980-986.
- 40 37. Ebbole DJ (2007) *Magnaporthe* as a model for understanding host-pathogen interactions.  
41 *Annu Rev Phytopathol* 45:437-456.
- 42 38. McIntosh JR & O'Toole ET (1999) Life cycles of yeast spindle pole bodies: getting  
43 microtubules into a closed nucleus. *Biol Cell* 91(4-5):305-312.
- 44 39. Bao J, *et al.* (2017) PacBio Sequencing Reveals Transposable Elements as a Key  
45 Contributor to Genomic Plasticity and Virulence Variation in *Magnaporthe oryzae*. *Mol*  
46 *Plant* 10(11):1465-1468.

- 1 40. Jeon J, *et al.* (2015) Genome-wide profiling of DNA methylation provides insights into  
2 epigenetic regulation of fungal development in a plant pathogenic fungus, *Magnaporthe*  
3 *oryzae*. *Sci Rep* 5:8567.
- 4 41. Cao H, *et al.* (2016) Characterization of 47 Cys2 -His2 zinc finger proteins required for  
5 the development and pathogenicity of the rice blast fungus *Magnaporthe oryzae*. *New*  
6 *Phytol* 211(3):1035-1051.
- 7 42. Chao C-CT & Ellingboe AH (1991) Selection for mating competence in *Magnaporthe*  
8 *grisea* pathogenic to rice. *Canadian Journal of Botany* 69(10):2130-2134.
- 9 43. Leung H, Borromeo ES, Bernardo MA, & Notteghem JL (1988) Genetic analysis of  
10 virulence in the Rice Blast fungus *Magnaporthe grisea*. *Phytopathology* 78:1227-1233.
- 11 44. Thon MR, *et al.* (2006) The role of transposable element clusters in genome evolution  
12 and loss of synteny in the rice blast fungus *Magnaporthe oryzae*. *Genome Biol* 7(2):R16.
- 13 45. Kobayashi N, *et al.* (2015) Discovery of an unconventional centromere in budding yeast  
14 redefines evolution of point centromeres. *Curr Biol* 25(15):2026-2033.
- 15 46. Rhind N, *et al.* (2011) Comparative functional genomics of the fission yeasts. *Science*  
16 332(6032):930-936.
- 17 47. Shang WH, *et al.* (2013) Chromosome engineering allows the efficient isolation of  
18 vertebrate neocentromeres. *Dev Cell* 24(6):635-648.
- 19 48. Thakur J & Sanyal K (2013) Efficient neocentromere formation is suppressed by gene  
20 conversion to maintain centromere function at native physical chromosomal loci in  
21 *Candida albicans*. *Genome Res* 23(4):638-652.
- 22 49. Simon L, Voisin M, Tatout C, & Probst AV (2015) Structure and function of centromeric  
23 and pericentromeric heterochromatin in *Arabidopsis thaliana*. *Front Plant Sci* 6:1049.
- 24 50. Fernandez-Alvarez A, Bez C, O'Toole ET, Morphew M, & Cooper JP (2016) Mitotic  
25 nuclear envelope breakdown and spindle nucleation are controlled by interphase contacts  
26 between centromeres and the nuclear envelope. *Dev Cell* 39(5):544-559.
- 27 51. Hou H, Kallgren SP, & Jia S (2013) Csi1 illuminates the mechanism and function of Rab1  
28 configuration. *Nucleus* 4(3).
- 29 52. Jaspersen SL, *et al.* (2006) The Sad1-UNC-84 homology domain in Mps3 interacts with  
30 Mps2 to connect the spindle pole body with the nuclear envelope. *J Cell Biol* 174(5):665-  
31 675.
- 32 53. Richmond D, Rizkallah R, Liang F, Hurt MM, & Wang Y (2013) Slk19 clusters  
33 kinetochores and facilitates chromosome bipolar attachment. *Mol Biol Cell* 24(5):566-  
34 577.
- 35 54. Baker RE & Rogers K (2005) Genetic and genomic analysis of the AT-rich centromere  
36 DNA element II of *Saccharomyces cerevisiae*. *Genetics* 171(4):1463-1475.
- 37 55. Ohzeki J, Nakano M, Okada T, & Masumoto H (2002) CENP-B box is required for de  
38 novo centromere chromatin assembly on human alphoid DNA. *J Cell Biol* 159(5):765-  
39 775.
- 40 56. Xiao H, *et al.* (2011) Nonhistone Scm3 binds to AT-rich DNA to organize atypical  
41 centromeric nucleosome of budding yeast. *Mol Cell* 43(3):369-380.
- 42 57. Koren A, *et al.* (2010) Epigenetically-inherited centromere and neocentromere DNA  
43 replicates earliest in S-phase. *PLoS Genet* 6(8):e1001068.
- 44 58. Kim SM, Dubey DD, & Huberman JA (2003) Early-replicating heterochromatin. *Genes*  
45 *Dev* 17(3):330-335.

- 1 59. Raghuraman MK, *et al.* (2001) Replication dynamics of the yeast genome. *Science*  
2 294(5540):115-121.
- 3 60. Mitra S, Gomez-Raja J, Larriba G, Dubey DD, & Sanyal K (2014) Rad51-Rad52  
4 mediated maintenance of centromeric chromatin in *Candida albicans*. *PLoS Genet*  
5 10(4):e1004344.
- 6 61. Sreekumar L, *et al.* (2018) DNA replication initiator proteins facilitate CENPA loading  
7 on early replicating compact chromatin. *bioRxiv*.
- 8 62. Cook DM, *et al.* (2018) Fork pausing allows centromere DNA loop formation and  
9 kinetochore assembly. *Proc Natl Acad Sci U S A* 115(46):11784-11789.
- 10 63. Anderson M, Haase J, Yeh E, & Bloom K (2009) Function and assembly of DNA  
11 looping, clustering, and microtubule attachment complexes within a eukaryotic  
12 kinetochore. *Mol Biol Cell* 20(19):4131-4139.
- 13 64. Gao D, Jiang N, Wing RA, Jiang J, & Jackson SA (2015) Transposons play an important  
14 role in the evolution and diversification of centromeres among closely related species.  
15 *Front Plant Sci* 6:216.
- 16 65. Neumann P, *et al.* (2011) Plant centromeric retrotransposons: a structural and cytogenetic  
17 perspective. *Mob DNA* 2(1):4.
- 18 66. Wong LH & Choo KH (2004) Evolutionary dynamics of transposable elements at the  
19 centromere. *Trends Genet* 20(12):611-616.

20

## 21 **Figure legends**

### 22 **Figure 1. Localization patterns of CenpA and CenpC reveal kinetochores are closely**

23 **associated with each other in *M. oryzae*.** (A) The *M. oryzae* strain MGYF03 exhibits a single

24 dot-like GFP-CenpA signal localized at the periphery of each nucleus marked by mCherry-

25 histone H1 in both mycelia (upper panel) and conidia (lower panel). (B) Similarly, another inner

26 kinetochore protein CenpC-GFP in the strain MGYF04 is found to be localized at the periphery

27 of the mCherry-histone H1 marked nucleus in both mycelia (upper panels) and conidia (lower

28 panels). (C) Co-localization of GFP-CenpA and CenpC-mCherry revealed complete overlapping

29 signals in both mycelia and conidia in the MGYF05 strain. (D) In the strain MGYF08, the

30 clusters of GFP-CenpA are closely associated with the spindle pole body (SPB) component

31 Alp6-mCherry. In addition to SPBs, the Alp6 signals were also observed at the septa (white

32 arrows). The fluorescence images shown here are maximum projections from Z stacks consisting

33 of 0.5  $\mu\text{m}$ -spaced planes. Scale bar = 10  $\mu\text{m}$ .



1

2 **Figure 2. Kinetochores decluster momentarily but arrange randomly on the spindle axis**

3 **before sister kinetochore separation during anaphase in *M. oryzae*.** (A) Time-lapse imaging

4 of strain MGYF07 cells exhibited that the GFP-CenpA signals separate from each other and

5 move along the mitotic spindle (mCherry-TubA). Also see movie S1. The images shown are

6 maximum projections of 0.3  $\mu\text{m}$ -spaced Z stacks. Scale bar = 2  $\mu\text{m}$ . (B) High-resolution time-

7 lapse images showing the declustering of kinetochores (GFP-CenpA) during the process of

8 mitosis in strain MGYF01 (Also, see Movie S2). The images were acquired with Z projections of

9 0.17- $\mu\text{m}$  step size. Scale bar = 1  $\mu\text{m}$ . (C) High-resolution time-lapse images of MGYF01 cells

10 showing the segregation dynamics of sister kinetochores in daughter cells during metaphase to

11 anaphase transition and finally reclustered of kinetochores in post-anaphase cells (Also see

12 movie S3). Scale bar = 2  $\mu\text{m}$ . (D) Spatial organization of kinetochores (GFP-CenpA) and SPBs

13 (Alp6-mCherry) in strain MGYF08 during pre-mitotic stage (upper panel) and early mitosis

14 (lower panel). Scale bar = 2  $\mu\text{m}$ . (E) A schematic depiction of centromere dynamics at specific

15 stages of the cell cycle in *M. oryzae*. For simplification, chromosomes and astral microtubules

16 are omitted in the schematic.

17

18 **Figure 3. Identification of centromeres in *M. oryzae*.** (A) Reads obtained from the GFP-

19 CenpA ChIP-sequencing in the cross-linked mycelia of the strain MGYF01 identified one

20 distinct enriched region on each of the seven contigs when aligned to the Guy11 genome

21 assembly (see SI Appendix, Figure S4 for the remaining contigs). CenpA-bound regions overlap

22 with AT-rich, poorly-transcribed regions on each contig, and harbor 5mC DNA methylation (see

23 text for details). The numbers in the bracket with parameters represent the minimum and

1 maximum value along the y-axis. **(B)** The zoomed view of centromere regions in Guy11  
2 depicting the presence of repeat elements, CenpA enrichment, polyA transcription and DNA  
3 methylation (5mC) status in these regions. A 200 kb region spanning the centromere is shown for  
4 each chromosome. The only common defining sequence feature of centromeres is AT-richness.  
5  
6 **Figure 4. Centromere DNA sequences in *M. oryzae* isolates are similar but vary in repeat**  
7 **content. (A)** A map showing seven chromosomes of *M. oryzae* with centromere locations  
8 marked on each chromosome. The chromosome length along with centromere length obtained  
9 from the ChIP-seq analysis is plotted to the scale on the available chromosome-wide 70-15  
10 genome assembly. However, telomeres are shown as 10 kb regions on either side for each  
11 chromosome for visualization purpose. **(B)** Map showing synteny conservation across  
12 centromere flanking regions among three isolates of *M. oryzae*. A 200 kb region including the  
13 centromere (Guy11 as reference) is shown. Also, see SI Appendix, Figure S9. **(C)** Dot-plot  
14 analysis of centromere sequences revealed centromere sequences between Guy11 and FJ81278  
15 are similar but differ in the repeat content. R denotes the repeat panels for both Guy11 and  
16 FJ81278. Also, see SI Appendix, Figure S10.  
17



1 Figure 1

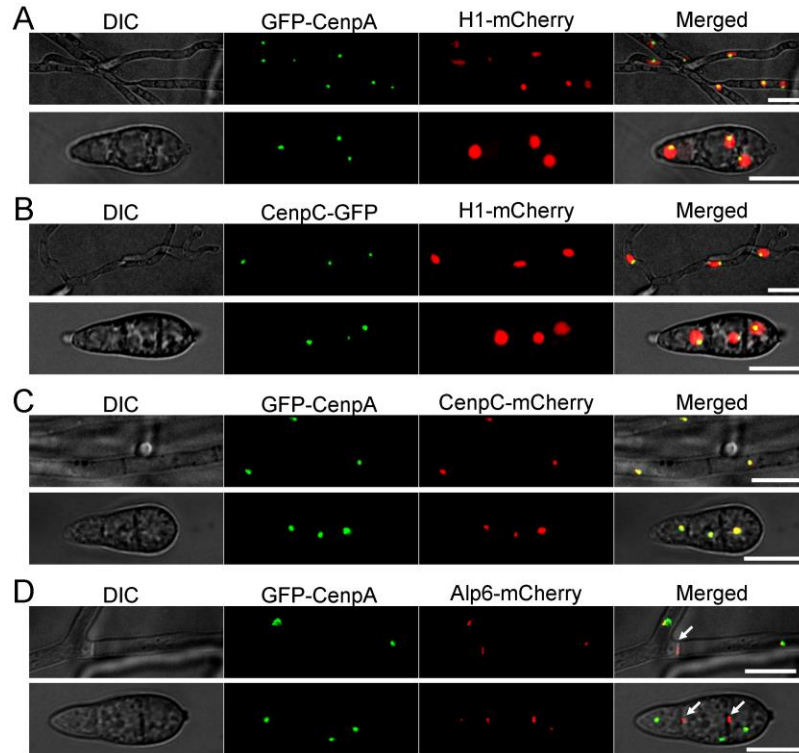

2

3

1 Figure 2

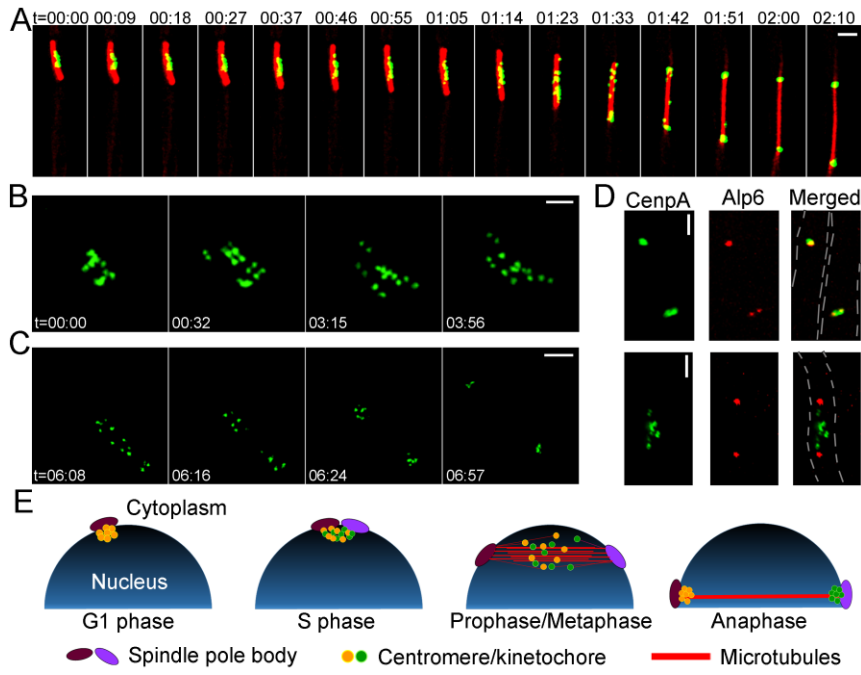

2

3

1 Figure 3

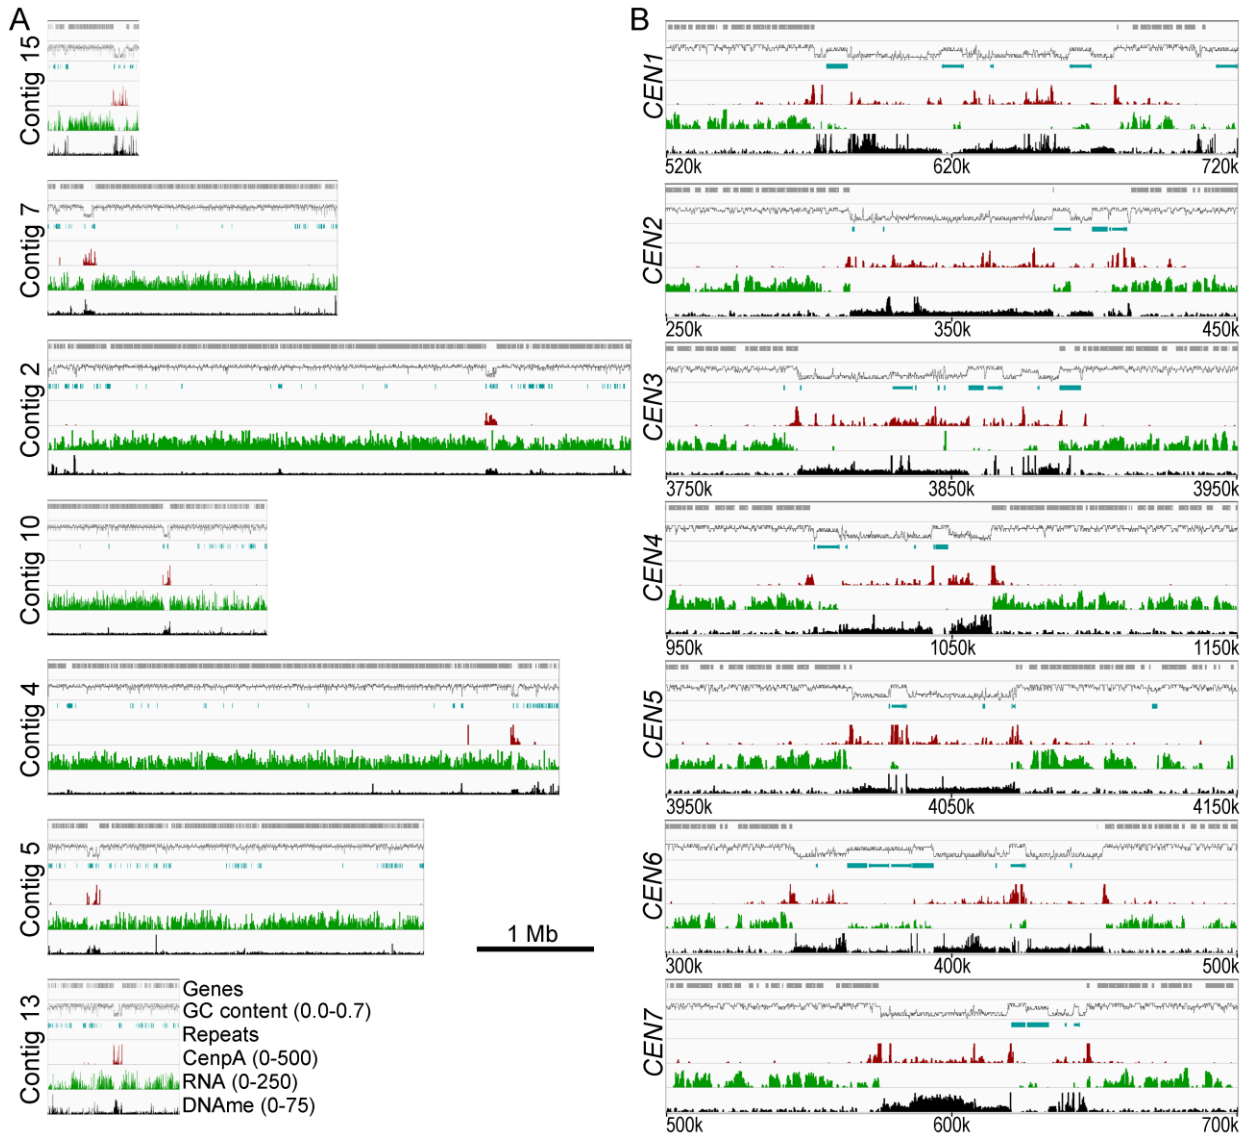

2

3

1 Figure 4

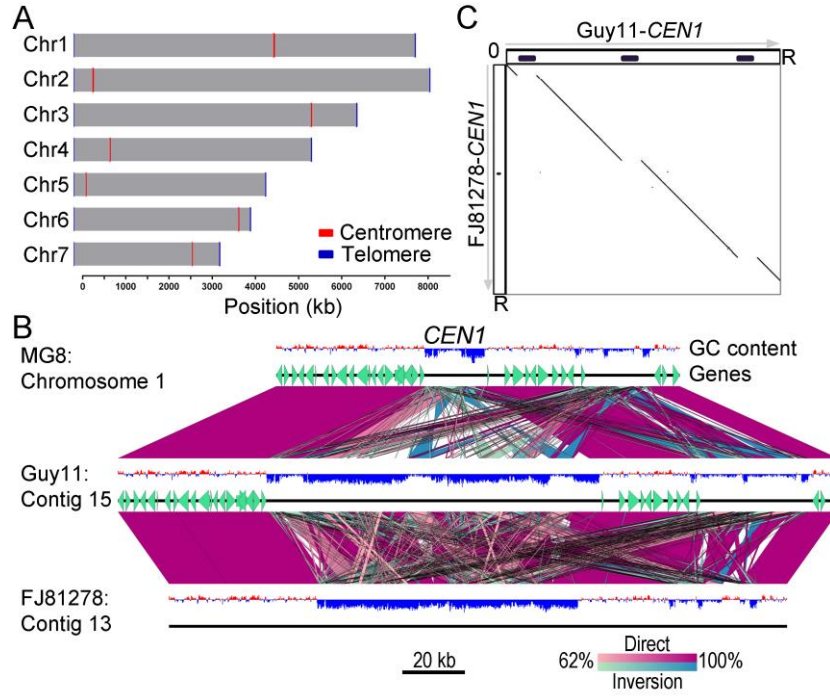

2

3

1 Table 1. Length and GC% of centromeres in *Magnaporthe oryzae*.

| <i>CEN #</i> | Centromere coordinates in Guy11             | % GC content<br>(Genomic GC content = 51.2%) |
|--------------|---------------------------------------------|----------------------------------------------|
| <i>CEN1</i>  | Contig15: 571735-678893 ( <b>1,07,159</b> ) | 29.2                                         |
| <i>CEN2</i>  | Contig7: 313767-411084 ( <b>97,318</b> )    | 30.8                                         |
| <i>CEN3</i>  | Contig2: 3795849-3894639 ( <b>98,791</b> )  | 33.0                                         |
| <i>CEN4</i>  | Contig10: 1000090-1063263 ( <b>63,174</b> ) | 30.5                                         |
| <i>CEN5</i>  | Contig4: 4014470-4071774 ( <b>57,305</b> )  | 28.0                                         |
| <i>CEN6</i>  | Contig5: 343714-452391 ( <b>1,08,678</b> )  | 32.3                                         |
| <i>CEN7</i>  | Contig13: 573351-645424 ( <b>72,074</b> )   | 30.5                                         |

2 Centromere numbers are according to the 70-15 genome assembly.

3 Numbers in the bracket represent centromere length in base pair.

4
